# Supplementary material for: PAR2-Induced Tissue Factor Synthesis by Primary Cultures of Human Kidney Tubular Epithelial Cells Is Modified by Glucose Availability
Source: MDPI journal article supplement (doi:10.3390/ijms22147532), 2021-07-14
Supplement: s1 [file s1]

**Figure S1**

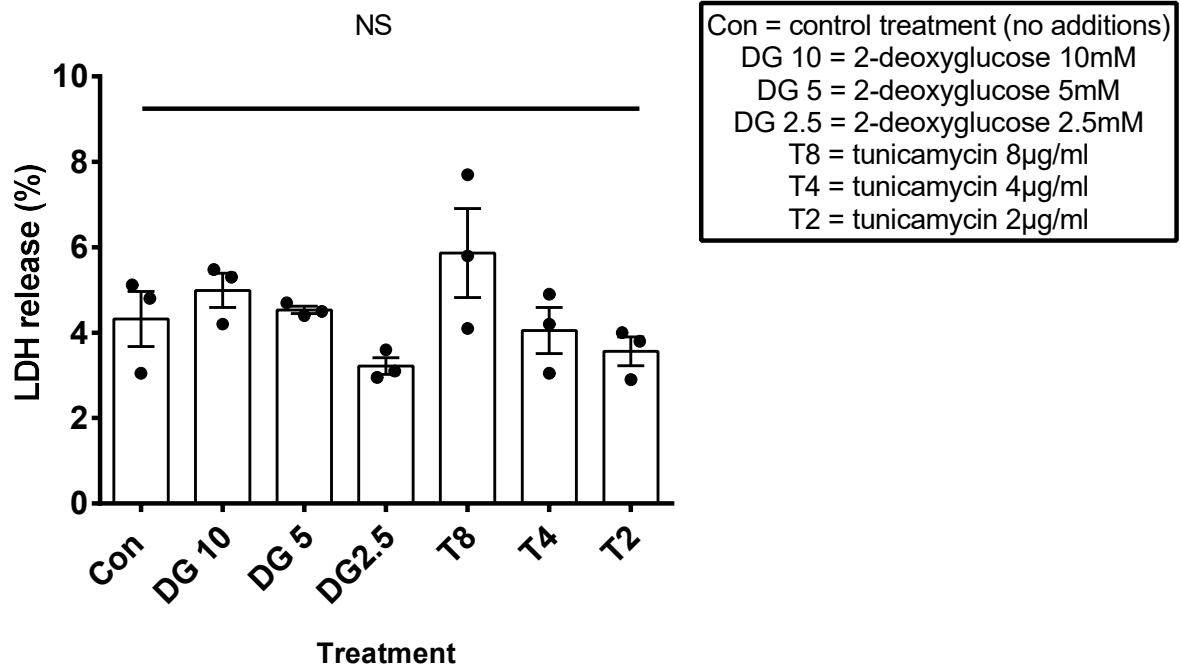

**Supplementary Figure S1.** Lactate dehydrogenase (LDH) release by HTEC treated with 2DOG or tunicamycin at the indicated concentrations was measured to test for toxicity.

The Pierce™ LDH Cytotoxicity Assay Kit (Catalog number:88953) (ThermoFisher Scientific, Fremont, CA, USA) was used according to manufacturers protocol was followed
